1 Association between the extent of DNA methylation at the CpG sites of *HIF3A* and  
2 parameters of obesity in the general Japanese population  
3

4 Genki Mizuno<sup>1,2</sup>, Hiroya Yamada<sup>3</sup>, Eiji Munetsuna<sup>4</sup>, Mirai Yamazaki<sup>5</sup>, Yoshitaka Ando<sup>1,6</sup>, Ryosuke Fujii  
5<sup>1</sup>, Yoshiki Tsuboi<sup>1</sup>, Atsushi Teshigawara<sup>6</sup>, Itsuki Kageyama<sup>6</sup>, Keisuke Osakabe<sup>7</sup>, Keiko Sugimoto<sup>7</sup>, Hiroaki  
6 Ishikawa<sup>6</sup>, Naohiro Ichino<sup>7</sup>, Yoshiji Ohta<sup>8</sup>, Koji Ohashi<sup>6</sup>, Shuji Hashimoto<sup>3</sup>, and Koji Suzuki<sup>1\*</sup>

7  
8<sup>1</sup> Department of Preventive Medical Sciences, Fujita Health University School of Medical Sciences, Toyoake,  
9 Aichi, Japan

10<sup>2</sup> Department of Joint Research Laboratory of Clinical Medicine, Fujita Health University Hospital, Toyoake,  
11 Aichi, Japan

12<sup>3</sup> Department of Hygiene, Fujita Health University School of Medicine, Toyoake, Aichi, Japan

13<sup>4</sup> Department of Biochemistry, Fujita Health University School of Medicine, Toyoake, Aichi, Japan

14<sup>5</sup> Department of Medical Technology, Kagawa Prefectural University of Health Sciences, Takamatsu,  
15 Kagawa, Japan

16 <sup>6</sup> Department of Clinical Biochemistry, Fujita Health University School of Medical Sciences, Toyoake, Aichi,

17 Japan

18 <sup>7</sup> Department of Clinical Physiology, Fujita Health University School of Medical Sciences, Toyoake, Aichi,

19 Japan

20 <sup>8</sup> Department of Chemistry, Fujita Health University School of Medicine, Toyoake, Aichi, Japan

21

22 \*Corresponding author

23 E-mail:ksuzuki@fujita-hu.ac.jp (KS)

24

25 Short Title

26 Association between DNA methylation of *HIF3A* and parameters of obesity

27

28

29

## 30 **Abstract**

31 Obesity is a major public health problem worldwide owing to the substantial increase in risk  
32 of metabolic diseases. Hypoxia-inducible factors (HIFs) regulate transcriptional responses to hypoxic  
33 stress. DNA methylation in the CpG sites of intron 1 of *HIF3A* is associated with body mass index in  
34 the whole blood and adipose tissue. This study investigates the correlation between DNA methylation  
35 of *HIF3A* and parameters of obesity, including thickness of visceral (VAT) and subcutaneous adipose  
36 tissues, in the general Japanese population. Participants (220 men and 253 women) who underwent  
37 medical examination were enrolled in this cross-sectional study. We used pyrosequencing to quantify  
38 DNA methylation (CpG sites of cg16672562, cg22891070, and cg27146050) in *HIF3A*. DNA  
39 methylation of *HIF3A* was only different in women. Multiple regression analysis showed that DNA  
40 methylation level at cg27146050 was associated with thickness of VAT in women. DNA methylation  
41 level at cg27146050 also correlated with body mass index and percentage of body fat in women after  
42 excluding smokers and non-smokers who quit smoking with the last 5 years. DNA methylation in the  
43 CpG site (cg27146050) of *HIF3A* correlated with parameters of obesity in Japanese women.

44

## 45 **Introduction**

46           Obesity is a major public health concern worldwide. In obese individuals, non-esterified  
47 fatty acids, adipokines, and other factors are extensively released from adipose tissues, thereby leading  
48 to abnormalities in obesity-related cell functions <sup>1</sup>. Consequently, obesity induces various diseases,  
49 such as insulin resistance, type 2 diabetes, and cardiovascular disease <sup>2,3</sup>. Thus, obesity is a risk factor  
50 for various metabolic diseases, and preventing obesity results in the prevention of metabolic diseases.  
51 Recent years have seen the diversification of lifestyle and eating habits that have increased the number  
52 of obese individuals globally <sup>4</sup>. Lifestyle, environmental factors, and genetic factors trigger obesity <sup>5</sup>,  
53 <sup>6</sup>. Lifestyle and/or environmental factors cause epigenetic alterations in several health conditions, such  
54 as obesity and metabolic disease <sup>7-10</sup>.

55           DNA methylation is an epigenetic mechanism that regulates gene expression by adding a  
56 methyl donor to cytosine to enable the regulation of transcription <sup>11</sup>. Lifestyle factors, including dietary  
57 habits, modulate DNA methylation <sup>12</sup>. Several animals <sup>13-15</sup> and epidemiological studies <sup>16-18</sup> have  
58 shown that environmental factors, including food intake, tobacco smoking, and alcohol consumption,  
59 cause DNA methylation in the blood or tissues. Moreover, global DNA hypermethylation in

60 leukocytes is associated with increased risk of cardiovascular diseases in the general Japanese  
61 population <sup>19</sup>. Thus, DNA methylation may be a novel biomarker for metabolic diseases caused by  
62 environmental factors and lifestyles.

63 Dick et al. <sup>20</sup> conducted two epigenetic genome-wide analyses to show the increase in DNA  
64 methylation at three CpG sites (cg16672562, cg22891070, and cg27146050) in intron 1 of *HIF3A* in  
65 the blood was associated with body mass index (BMI). Similarly, Main et al. <sup>21</sup> and Wang et al. <sup>22</sup>  
66 demonstrated that DNA methylation in *HIF3A* in the blood is associated with BMI in patients with  
67 type 2 diabetes and childhood obesity, respectively. Isoforms of HIF are constitutively expressed in  
68 mammalian cells and regulate transcriptional response to hypoxic stress <sup>23, 24</sup>. HIFs are unstable at  
69 normal oxygen levels in mammalian cells. The reduction in normal cellular oxygen levels caused by  
70 environmental factors, diseases, effusion of blood, and adiposity stabilize HIFs, thereby enabling its  
71 nucleocytoplasmic translocation and binding to the hypoxia response element in the promoter of target  
72 genes and regulating target gene transcription and expression. Pfeiffer et al. <sup>25</sup> have shown that  
73 methylation of *HIF3A* in the adipose tissue correlates with dysfunctional human subcutaneous adipose  
74 tissue (SAT) and visceral adipose tissue (VAT). These studies indicate that DNA methylation of

75 *HIF3A* is associated with the development of obesity, and may be an obesity-related factor worldwide.  
76 Furthermore, DNA methylation of *HIF3A* in the blood is associated with insulin resistance in patients  
77 with type 2 or gestational diabetes <sup>21,26</sup>. There are only a few reports on the association between DNA  
78 methylation of *HIF3A* and BMI in humans. The thickness of adipose tissues is a more reliable  
79 parameter of obesity as compared to BMI that is an indirect parameter. To the best of our knowledge,  
80 there is no study on the correlation between DNA methylation of *HIF3A* and thickness of adipose  
81 tissues, such as VAT and SAT, that directly reflects obesity.

82 In this study, we attempted to verify whether DNA methylation of *HIF3a* (CpG sites of  
83 cg16672562, cg22891070, and cg27146050) in the blood associated with the thickness of VAT and  
84 SAT in the general Japanese population. We further determined whether DNA methylation in *HIF3A*  
85 in the blood correlated with the thickness of VAT and SAT in Japanese non-smokers <sup>27,28</sup>.

86

## 87 **Materials and methods**

### 88 **Participants**

89 This cross-sectional study was approved by the Ethics Review Committee of Fujita Health

90 University (Approval number: HG19-069). We enrolled 473 participants (220 men and 253 women)  
91 who took part in the medical examination of the general (middle-aged) population in Yakumo town,  
92 Hokkaido, Japan, in August 2015 <sup>29,30</sup>. We obtained written informed consent from all the participants  
93 for the use of individual genome samples. Information on lifestyle habits was obtained from  
94 questionnaires.

95

## 96 **Measurements of obesity parameters**

97 Parameters of obesity were measured as described previously <sup>31</sup>. Percentage of body fat (%  
98 body fat) was measured using bioelectrical impedance analysis with the Tanita MC780 multifrequency  
99 segmental body composition analyzer (Tokyo, Japan). The thicknesses of VAT and SAT were  
100 assessed using ultrasound with ProSound a7 and UST-9130 convex probe (Hitachi Aloka Medical,  
101 Ltd, Tokyo, Japan). Thickness of VAT and SAT were defined as the distance (cm) from the  
102 peritoneum to the vertebral bodies and depth (cm) from the skin to the linea alba, respectively.

103

## 104 **Blood test and determination of DNA methylation**

105 Blood was collected during the medical examination of the general population, and the  
106 serum was separated from the blood by centrifugation at 2,000×g for 10 min at room temperature. For  
107 biochemical analysis of the blood, enzymes and components in the serum were assayed using an auto-  
108 analyzer (JCS-BM1650, Nihon Denshi Co., Tokyo, Japan) at Yakumo General Hospital.

109 DNA methylation was analyzed using the buffy coat obtained upon centrifugation of the  
110 blood collected in ethylenediaminetetraacetic acid (EDTA)-2Na-containing tubes under the same  
111 conditions as those used for blood biochemical tests. Genomic DNA was extracted from the buffy coat  
112 using the NucleoSpin Tissue kit (Takara, Shiga, Japan). Bisulfite conversion was performed using the  
113 Epiect Bisulfite Kit (Qiagen, Valencia, CA, USA). Polymerase chain reaction (PCR) was used to  
114 amplify the intron 1 of *HIF3A* using EpiTaq™ HS (for bisulfite-treated DNA; Takara, Shiga, Japan).  
115 Levels of DNA methylation were quantified using pyrosequencing with the PyroMark Q24 Advanced  
116 kit (Qiagen, Valencia, CA, USA) and analyzed using the parameters previously described <sup>20-22</sup>,  
117 including three CpG sites (Fig 1). Table 1 lists the sequences of primers used for PCR and  
118 pyrosequencing. The primers used for pyrosequencing were designed based on a previous study <sup>25</sup>  
119 using PyroMark Assay Design 2.0 (Qiagen, Valencia, CA, USA).



120 **Fig 1. A target sequence of intron 1 region in *HIF3A* gene**

121 The target region of *HIF3A* gene DNA methylation analyzed by pyrosequence was decided based on  
122 previous studies. It has reported that the 3 CpG sites (cg16672562, cg22891070 and cg27146050) of  
123 intron 1 in *HIF3A* gene in the blood are associated with BMI in EWAS study.

124 **Table 1. Sequences of primers used for PCR and Pyrosequence**

| Primer     | Sequence (5'-3')           |
|------------|----------------------------|
| Forward    | TGGTTGAAGGGTATTTAGGG       |
| Reverse    | Biotin-ACTCTATCCCACCCCTTTT |
| Sequence 1 | TTTAGGGGGTGTAGG            |
| Sequence 2 | GGTGAGATGATTTTATAGGAA      |

125

126 **Statistical analysis**

127 All statistical analyses were performed using JMP version 14.0 (SAS Institute, Cary, NC,  
128 USA). Serum aspartate transaminase (AST), alanine transaminase (ALT), triglyceride, and high-  
129 density lipoprotein (HDL) cholesterol levels have been represented by the geometric means and

130 interquartile ranges owing to log-normal distribution. Other characteristics (including DNA  
131 methylation) have been represented as mean±standard deviation (SD). We analyzed the association of  
132 DNA methylation level at each CpG site of intron 1 in *HIF3A* with the parameters of obesity using  
133 single correlation and multiple linear regression and adjusted for age, systolic blood pressure,  
134 hemoglobin A1c, %neutrophil, smoking habit and exercise habit. For multiple testing, the Bonferroni  
135 method was used to counteract the problem of multiple comparisons.  $P<0.05$  was considered  
136 statistically significant.

137

## 138 **Results**

139 Table 2 lists the characteristics of the participants in this study. There were significant  
140 differences in various parameters of obesity between men and women, such as smoking habit and  
141 blood biochemical test, but not hemoglobin A1c and blood pressure. Moreover, DNA methylation  
142 levels at three CpG sites in intron 1 of *HIF3A* were significantly different between the sexes (Table  
143 3).

144 **Table 2. Characteristics of participants in this study**

|                                 | <b>Men</b>         | <b>Women</b>      | <b>P-value</b>      |
|---------------------------------|--------------------|-------------------|---------------------|
| n                               | 220                | 253               |                     |
| Age (years)                     | 66.3 ± 8.28        | 64.5 ± 8.00       | 0.017 <sup>a</sup>  |
| Blood glucose (mg/dL)           | 93.8 ± 14.5        | 87.6 ± 17.0       | <0.001 <sup>a</sup> |
| Hemoglobin A1c (%)              | 5.80 ± 0.54        | 5.72 ± 0.55       | 0.190               |
| AST (IU/L)                      | 23.4 (19.0-26.8)   | 21.6 (18.0-24.5)  | 0.003 <sup>b</sup>  |
| ALT (IU/L)                      | 23.1 (17.3-31.0)   | 18.9 (14.0-24.0)  | <0.001 <sup>b</sup> |
| Triglyceride (mg/dL)            | 102.5 (72.0-144.8) | 86.3 (64.5-117.0) | <0.001 <sup>b</sup> |
| Total cholesterol (mg/dL)       | 203.5 ± 32.4       | 217.5 ± 35.0      | <0.001 <sup>a</sup> |
| HDL cholesterol (mg/dL)         | 52.4 (44.0-61.0)   | 61.8 (53.0-72.0)  | <0.001 <sup>b</sup> |
| LDL cholesterol (mg/dL)         | 121.3 ± 30.2       | 127.0 ± 31.1      | 0.042 <sup>a</sup>  |
| Systolic blood pressure (mmHg)  | 134.8 ± 20.6       | 128.8 ± 19.2      | 0.001 <sup>a</sup>  |
| Diastolic blood pressure (mmHg) | 79.8 ± 13.0        | 72.9 ± 12.6       | <0.001 <sup>a</sup> |
| Various parameters of obesity   |                    |                   |                     |

|                          |             |             |                     |
|--------------------------|-------------|-------------|---------------------|
| BMI (kg/m <sup>2</sup> ) | 24.1 ± 2.78 | 23.0 ± 3.60 | <0.001 <sup>a</sup> |
| VAT thickness (cm)       | 64.6 ± 14.7 | 50.4 ± 11.7 | <0.001 <sup>a</sup> |
| SAT thickness (cm)       | 14.3 ± 3.81 | 13.2 ± 4.62 | 0.006 <sup>a</sup>  |
| % body fat               | 23.7 ± 4.16 | 32.8 ± 6.13 | <0.001 <sup>a</sup> |
| Smoking habit, n (%)     |             |             |                     |
| Never                    | 45 (21)     | 193 (77)    | <0.001 <sup>c</sup> |
| Ever                     | 126 (57)    | 40 (16)     |                     |
| Current                  | 49 (22)     | 19 (7)      |                     |
| Exercise habit, n (%)    |             |             |                     |
| few                      | 102 (47)    | 139 (55)    | 0.366               |
| sometimes                | 43 (20)     | 44 (17)     |                     |
| 1 time/week              | 24 (11)     | 23 (9)      |                     |
| >2 times/week            | 49 (22)     | 47 (19)     |                     |

145 Values are mean ± SD, geometric mean (25-75th percentiles), or n (%).  $P < 0.05$  was considered

146 statistically significant. a: student t test, b: Wilcoxon test, c: Pearson's chi-square test

147

148 Correlations between DNA methylation levels at the CpG sites in intron 1 of *HIF3A* and

149 parameters of obesity were analyzed using single linear regression owing to the differences in DNA

150 methylation of *HIF3A* in men and women (Tables 3 and 4). There was no significant correlation

151 between DNA methylation level at each CpG site and the parameters of obesity in men and women.

152 **Table 3. DNA methylation levels (%) at *HIF3A* gene sites by pyrosequence analysis**

| CpG site   | Men         | Women       | <i>P</i> -value     |
|------------|-------------|-------------|---------------------|
| cg16672562 | 17.3 ± 5.12 | 20.1 ± 5.96 | <0.001 <sup>a</sup> |
| cg22891070 | 21.5 ± 7.37 | 24.9 ± 8.03 | <0.001 <sup>a</sup> |
| cg27146050 | 14.3 ± 4.74 | 17.1 ± 5.00 | <0.001 <sup>a</sup> |
| mean       | 17.6 ± 5.00 | 20.6 ± 5.57 | <0.001 <sup>a</sup> |

153 Values are mean ± SD. *P* < 0.05 was considered statistically significant. a: student t test

154 **Table 4. Single correlation analysis between *HIF3A* gene DNA methylation levels and obesity**

155 **parameters in Japanese men and women**

| <b>Men</b>      |            |          |            |          |            |          |                   |          |
|-----------------|------------|----------|------------|----------|------------|----------|-------------------|----------|
| <b>CpG site</b> | <b>BMI</b> |          | <b>VAT</b> |          | <b>SAT</b> |          | <b>% Body fat</b> |          |
|                 | <i>r</i>   | <i>P</i> | <i>r</i>   | <i>P</i> | <i>r</i>   | <i>P</i> | <i>r</i>          | <i>P</i> |
| cg16672562      | 0.087      | 0.210    | 0.082      | 0.244    | 0.029      | 0.682    | 0.074             | 0.295    |
| cg22891070      | 0.114      | 0.111    | 0.028      | 0.689    | 0.045      | 0.525    | 0.054             | 0.444    |
| cg27146050      | 0.013      | 0.854    | -0.006     | 0.937    | 0.050      | 0.478    | -0.021            | 0.766    |
| mean            | 0.089      | 0.202    | 0.049      | 0.565    | 0.048      | 0.496    | 0.046             | 0.520    |
| <b>Women</b>    |            |          |            |          |            |          |                   |          |
| <b>CpG site</b> | <b>BMI</b> |          | <b>VAT</b> |          | <b>SAT</b> |          | <b>% Body fat</b> |          |
|                 | <i>r</i>   | <i>P</i> | <i>r</i>   | <i>P</i> | <i>r</i>   | <i>P</i> | <i>r</i>          | <i>P</i> |
| cg16672562      | -0.029     | 0.661    | -0.066     | 0.317    | 0.025      | 0.704    | -0.026            | 0.690    |
| cg22891070      | 0.024      | 0.720    | -0.042     | 0.530    | 0.047      | 0.476    | 0.049             | 0.461    |
| cg27146050      | -0.038     | 0.562    | -0.109     | 0.099    | -0.028     | 0.679    | -0.045            | 0.497    |
| mean            | 0.176      | 0.791    | 0.075      | 0.263    | 0.019      | 0.771    | 0.006             | 0.926    |

157

158 Table 5 shows the results of multiple linear regression analysis for the correlation between

159 DNA methylation levels at CpG sites in intron 1 of *HIF3A* and the parameters of obesity. In men, there

160 was no significant correlation between DNA methylation level at each CpG site and the parameters of

161 obesity. In women, significant correlations were observed between DNA methylation level at

162 cg27146050 and VAT thickness ( $P < 0.05$ ). However, DNA methylation levels at cg16672562 and

163 cg22891070 did not significantly correlate with any parameter of obesity in women.

164 **Table 5. Multiple linear regression analysis for correlations between *HIF3A* gene DNA**

165 **methylation levels and obesity parameters**

| <b>Men</b>      |            |       |            |       |            |       |                   |       |
|-----------------|------------|-------|------------|-------|------------|-------|-------------------|-------|
| <b>CpG site</b> | <b>BMI</b> |       | <b>VAT</b> |       | <b>SAT</b> |       | <b>% Body fat</b> |       |
|                 | $\beta$    | $P$   | $\beta$    | $P$   | $\beta$    | $P$   | $\beta$           | $P$   |
| cg16672562      | 0.060      | 0.391 | 0.092      | 0.175 | -0.024     | 0.736 | 0.052             | 0.462 |
| cg22891070      | 0.081      | 0.241 | 0.030      | 0.656 | -0.007     | 0.922 | 0.040             | 0.570 |

|                 |            |       |            |       |            |       |                   |       |
|-----------------|------------|-------|------------|-------|------------|-------|-------------------|-------|
| cg27146050      | -0.012     | 0.868 | 0.005      | 0.938 | -0.016     | 0.819 | -0.038            | 0.594 |
| mean            | 0.059      | 0.402 | 0.050      | 0.467 | -0.016     | 0.818 | 0.027             | 0.706 |
| <b>Women</b>    |            |       |            |       |            |       |                   |       |
|                 | <b>BMI</b> |       | <b>VAT</b> |       | <b>SAT</b> |       | <b>% Body fat</b> |       |
| <b>CpG site</b> | $\beta$    | $P$   | $\beta$    | $P$   | $\beta$    | $P$   | $\beta$           | $P$   |
| cg16672562      | -0.071     | 0.299 | -0.084     | 0.220 | -0.027     | 0.682 | -0.062            | 0.369 |
| cg22891070      | -0.002     | 0.974 | -0.060     | 0.374 | 0.004      | 0.946 | 0.021             | 0.755 |
| cg27146050      | -0.085     | 0.215 | -0.161     | 0.029 | -0.095     | 0.156 | -0.095            | 0.165 |
| mean            | -0.059     | 0.400 | -0.104     | 0.140 | -0.039     | 0.569 | -0.047            | 0.505 |

166 Adjusted for age, systolic blood pressure, hemoglobin A1c, %neutrophil, smoking habit and exercise  
 167 habit.  $P < 0.05$  was considered statistically significant.

168

169 Smoking habits alter the status of DNA methylation<sup>27, 28</sup>. Therefore, we examined whether

170 DNA methylation of the different regions of *HIF3A* were associated with the parameters of obesity in

171 non-smokers (i.e., the participants excluding current smokers and non-smokers who stopped smoking



172 within the last 5 years; Table 6). There was no significant correlation between DNA methylation level

173 at each CpG site and the parameters of obesity in men. In women, there were significant correlations

174 between DNA methylation level at cg27146050 and BMI, VAT thickness, and % body fat ( $P < 0.05$ ).

175 **Table 6. Multiple linear regression analysis for correlations between HIF3A gene DNA**

176 **methylation and obesity parameters in non-smokers**

| <b>Men</b>      |            |       |            |       |            |       |                   |       |
|-----------------|------------|-------|------------|-------|------------|-------|-------------------|-------|
| <b>CpG site</b> | <b>BMI</b> |       | <b>VAT</b> |       | <b>SAT</b> |       | <b>% Body fat</b> |       |
|                 | $\beta$    | $P$   | $\beta$    | $P$   | $\beta$    | $P$   | $\beta$           | $P$   |
| cg16672562      | 0.086      | 0.306 | 0.098      | 0.228 | -0.046     | 0.581 | 0.068             | 0.426 |
| cg22891070      | 0.101      | 0.233 | 0.040      | 0.627 | 0.004      | 0.963 | 0.030             | 0.727 |
| cg27146050      | -0.017     | 0.847 | 0.012      | 0.883 | -0.027     | 0.754 | -0.067            | 0.449 |
| mean            | 0.077      | 0.368 | 0.059      | 0.475 | -0.228     | 0.790 | 0.020             | 0.821 |
| <b>Women</b>    |            |       |            |       |            |       |                   |       |
|                 | <b>BMI</b> |       | <b>VAT</b> |       | <b>SAT</b> |       | <b>% Body fat</b> |       |

| CpG site   | $\beta$ | $P$   | $\beta$ | $P$   | $\beta$ | $P$   | $\beta$ | $P$   |
|------------|---------|-------|---------|-------|---------|-------|---------|-------|
| cg16672562 | -0.009  | 0.103 | -0.075  | 0.311 | -0.050  | 0.492 | -0.110  | 0.133 |
| cg22891070 | -0.059  | 0.413 | -0.068  | 0.345 | -0.007  | 0.924 | -0.019  | 0.791 |
| cg27146050 | -0.152  | 0.040 | -0.179  | 0.016 | -0.110  | 0.132 | -0.162  | 0.029 |
| mean       | -0.124  | 0.096 | -0.114  | 0.129 | -0.056  | 0.449 | -0.102  | 0.170 |

177 Adjusted for age, systolic blood pressure, hemoglobin A1c, %neutrophil and exercise habit, and  
178 excluded for current smoker (include stopped smoking less than 5 years).  $P < 0.05$  was considered  
179 statistically significant.

180

## 181 Discussion

182 We determined the association between DNA methylation at three CpG sites (cg16672562,  
183 cg22891070, and cg27146050) of the intron 1 of *HIF3A* and parameters of obesity in the general  
184 Japanese population. There was a significant difference in the DNA methylation of *HIF3A* between  
185 the sexes. Multiple linear regression analysis showed a correlation between DNA methylation at  
186 cg27146050 in *HIF3A* and thickness of VAT in women. Excluding current smokers and non-smokers

187 who stopped smoking within the last 5 years, there correlations between DNA methylation at  
188 cg27146050 in *HIF3A* and thickness of VAT thickness, BMI, and % body fat in women.

189 In this study, DNA methylation at each CpG site of intron 1 of *HIF3A* was higher in women  
190 than those in men. This was consistent with that reported by Main et al. <sup>21</sup>. This difference between  
191 men and women suggests that women exhibit lower expression of *HIF3A* during hypoxia than the  
192 expression in men under similar conditions owing to differential capacities of gene regulation. Women  
193 exhibit a relatively less pronounced physiological response to hypoxic stress than that in men <sup>32</sup>. This  
194 can be attributed to the increase in DNA methylation of *HIF3A* in women.

195 Dietary factors, such as nutrition, cause a change in DNA methylation <sup>12</sup>. We have recently  
196 demonstrated that the intake of dietary vitamin affects lipid profiles via the modulation of DNA  
197 methylation within lipid-related genes <sup>16</sup>. DNA methylation variants of *HIF3A* are associated with  
198 alterations in BMI based on the consumption of total vitamins or supplemental vitamin B <sup>33</sup>. Therefore,  
199 it is possible that the intake of vitamins or other nutrients causes a change in DNA methylation in  
200 *HIF3A*, thereby resulting in the development of obesity.

201 Tobacco smoking is another environmental factor that affects the incidence of obesity <sup>34</sup>.

202 DNA methylation positively correlates with smoking habits<sup>27,28</sup>. Thus, smoking habits may influence  
203 the association between *HIF3A* DNA methylation and the parameters of obesity. We determined  
204 whether DNA methylation in *HIF3A* associated with parameters of obesity in non-smokers (excluding  
205 current smokers and non-smokers who stopped smoking within the last 5 years). The correlation  
206 between DNA methylation at various sites of *HIF3A* and parameters of obesity increased in this  
207 population than that including non-smokers and smokers. To the best of our knowledge, this is the  
208 first report on the correlation between DNA methylation levels at the CpG sites in *HIF3A* and  
209 parameters of obesity, such as thickness of VAT and smoking habits, in the general Japanese  
210 population. However, smokers were not excluded from the group of non-smokers. Therefore, future  
211 studies should focus on determining the association between DNA methylation in *HIF3A* and  
212 parameters of obesity within non-smokers.

213 Dick et al.<sup>20</sup> demonstrated the correlation between DNA methylation levels at three CpG  
214 sites (cg16672562, cg22891070, and cg27146050) in intron 1 of *HIF3A* in the blood and BMI; this  
215 has also been confirmed by other studies<sup>21,34</sup>. In women, DNA methylation at cg27146050 correlated  
216 with the thickness of VAT (based on multiple linear regression analysis). However, this association

217 has been reported in men <sup>20</sup>. This discrepancy may be explained attributed to the differences in DNA  
218 methylation of *HIF3A* and smoking habits of men and women. Thus, future studies are warranted to  
219 elucidate the extent of DNA methylation in *HIF3A* between men and women.

220 Dick et al. <sup>20</sup> used a microarray to demonstrate the association between *HIF3A* DNA  
221 methylation and BMI in humans. Microarrays are useful in understanding global DNA methylation.  
222 However, this technique cannot measure methylation using immobilized methylated probes and  
223 exhibits poor quantification. Thus, this study employed pyrosequencing to analyze DNA methylation  
224 in *HIF3A*. This method is excellent in quantifying the extent of DNA methylation at selected CpG  
225 sites in specific target genes. Thus, pyrosequencing provides a more reliable scenario of the association  
226 between DNA methylation at CpG sites of intron 1 of *HIF3A* and parameters of obesity in the general  
227 Japanese population than the correlation reported by Dick et al. <sup>20</sup>.

228 Finally, Hatanaka et al. <sup>35</sup> showed that the ectopic expression of *HIF3A* induces the  
229 expression of several adiposity-associated genes in 3T3-L1 cells. This suggests that low levels of DNA  
230 methylation in *HIF3A* upregulates *HIF3A*, thereby resulting in adiposity. Accordingly, we observed a  
231 positive correlation between DNA methylation in *HIF3A* and thickness of VAT (that directly reflects

232 obesity as compared to BMI) in women. Therefore, the thickness of VAT has important clinical  
233 implications in obesity-related diseases.

234 Taken together, the DNA methylation level at cg27146050 of intron 1 of *HIF3A* correlated  
235 well with parameters of obesity in non-smokers of the general Japanese women. This study has some  
236 limitations. First, the data do not show a causal relationship between DNA methylation at different  
237 sites of *HIF3A* and parameters of obesity since this was a cross-sectional study. Second, this study  
238 analyzed a small sample size. Finally, we did not determine alterations in the mRNA levels of *HIF3A*.  
239 Thus, future studies should focus on analyzing the association between DNA methylation level in  
240 *HIF3A* and the parameters of obesity over a longer period using a larger sample size. Furthermore, we  
241 will attempt to analyze the mRNA and protein levels of *HIF3A* in the blood of participants.

242

## 243 **Conclusion**

244 This is the first study to report the correlation between DNA methylation at CpG site in  
245 *HIF3A* and parameters of obesity, such as thickness of visceral adipose tissue and smoking habit, in  
246 the general Japanese population. DNA methylation of the CpG sites of *HIF3A* may be associated with

247 body mass index.

248

## 249 **Acknowledgments**

250 We thank the participants and staff of the Health Examination Program for Residents of

251 Yakumo, Hokkaido, Japan.

252

## 253 **Conflict of interest**

254 There is no conflict of interest.

255

## 256 **Reference**

257 1. Blüher M. Adipose tissue dysfunction in obesity. *Exp Clin Endocrinol Diabetes* 2009;117(6): 241-

258 250. doi: 10.1055/s-0029-1192044. PubMed PMID: 19358089.

259 2. Bastien M, Poirier P, Lemieux I, Després JP. Overview of epidemiology and contribution of obesity

260 to cardiovascular disease. *Prog Cardiovasc Dis* 2014;56: 369-381. doi: 10.1016/j.pcad.2013.10.016.

261 PubMed PMID: 24438728.

- 262 3. Kahn SE, Hull RL, Utzschneider KM. Mechanisms linking obesity to insulin resistance and type 2  
263 diabetes. *Nature* 2006;444(7121): 840-846. doi: 10.1038/nature05482. PubMed PMID: 17167471.
- 264 4. Blüher M. Obesity: global epidemiology and pathogenesis. *Nat Rev Endocrinol* 2019;15(5): 288-  
265 298. doi: 10.1038/s41574-019-0176-8. PubMed PMID: 30814686.
- 266 5. Hruby A, Manson JE, Qi L, Malik VS, Rimm EB, Sun Q, et al. Determinants and Consequences of  
267 Obesity. *Am J Public Health* 2016;106(9): 1656-1662. doi: 10.2105/AJPH.2016.303326. PubMed  
268 PMID: 27459460.
- 269 6. Temelkova-Kurktschiev T, Stefanov T. Lifestyle and genetics in obesity and type 2 diabetes. *Exp*  
270 *Clin Endocrinol Diabetes* 2012;120(1): 1-6. doi: 10.1055/s-0031-1285832. PubMed PMID: 21915815.
- 271 7. Yamada H, Ohashi K, Suzuki K, Munetsuna E, Ando Y, Yamazaki M, et al. Longitudinal study of  
272 circulating miR-122 in a rat model of non-alcoholic fatty liver disease. *Clin Chim Acta* 2015;446: 267-  
273 271. doi: 10.1016/j.cca.2015.05.002. PubMed PMID: 25958847.
- 274 8. Hiratsuka I, Yamada H, Munetsuna E, Hashimoto S, Itoh M. Circulating MicroRNAs in Graves'  
275 Disease in Relation to Clinical Activity. *Thyroid* 2016;26(10): 1431-1440. doi: 10.1089/thy.2016.0062.  
276 PubMed PMID: 27610819.



- 277 9. van Dijk SJ, Molloy PL, Varinli H, Morrison JL, Muhlhausler BS. Epigenetics and human obesity.  
278 *Int J Obes (Lond)* 2015;39(1): 85-97. doi: 10.1038/ijo.2014.34. PubMed PMID: 24566855.
- 279 10. van Dijk SJ, Tellam RL, Morrison JL, Muhlhausler BS, Molloy PL. Recent developments on the  
280 role of epigenetics in obesity and metabolic disease. *Clin Epigenetics* 2015;7: 66. doi:  
281 10.1186/s13148-015-0101-5. PubMed PMID: 27408648.
- 282 11. Moore LD, Le T, Fan G. DNA methylation and its basic function. *Neuropsychopharmacology*  
283 2013;38(1): 23-38. doi: 10.1038/npp.2012.112. PubMed PMID: 22781841.
- 284 12. Lim U, Song MA. Dietary and lifestyle factors of DNA methylation. *Methods Mol Biol* 2012;863:  
285 359-376. doi: 10.1007/978-1-61779-612-8\_23. PubMed PMID: 22359306.
- 286 13. Munetsuna E, Yamada H, Yamazaki M, Ando Y, Mizuno G, Hattori Y, et al. Maternal high-  
287 fructose intake increases circulating corticosterone levels via decreased adrenal corticosterone  
288 clearance in adult offspring. *J Nutr Biochem* 2019;67: 44-50. doi: 10.1016/j.jnutbio.2019.01.016.  
289 PubMed PMID: 30856463.
- 290 14. Ohashi K, Munetsuna E, Yamada H, Ando Y, Yamazaki M, Taromaru N, et al. High fructose  
291 consumption induces DNA methylation at PPAR $\alpha$  and CPT1A promoter regions in the rat liver.

- 292 *Biochem Biophys Res Commun* 2015;468: 185-189. doi: 10.1016/j.bbrc.2015.10.134. PubMed PMID:  
293 26519879.
- 294 15. Yamazaki M, Munetsuna E, Yamada H, Ando Y, Mizuno G, Murase Y, et al. Fructose  
295 consumption induces hypomethylation of hepatic mitochondrial DNA in rats. *Life Sci* 2016;149: 146-  
296 152. doi: 10.1016/j.lfs.2016.02.020. PubMed PMID: 26869391.
- 297 16. Fujii R, Yamada H, Munetsuna E, Yamazaki M, Ando Y, Mizuno G, et al. Associations between  
298 dietary vitamin intake, ABCA1 gene promoter DNA methylation, and lipid profiles in a Japanese  
299 population. *Am J Clin Nutr* 2019;110(5): 1213-1219. doi: 10.1093/ajcn/nqz181. PubMed PMID:  
300 31504085.
- 301 17. Fujii R, Yamada H, Munetsuna E, Yamazaki M, Mizuno G, Tsuboi Y, et al. Dietary vegetable  
302 intake is inversely associated with ATP-binding cassette protein A1 (ABCA1) DNA methylation  
303 levels among Japanese women. *Nutrition* 2019;65: 1-5. doi: 10.1016/j.nut.2019.02.010. PubMed  
304 PMID: 31029915.
- 305 18. Gao X, Zhang Y, Breitling LP, Brenner H. Tobacco smoking and methylation of genes related to  
306 lung cancer development. *Oncotarget* 2016;7(37): 59017-59028. doi: 10.18632/oncotarget.10007.

307 PubMed PMID: 27323854.

308 19. Tsuboi Y, Yamada H, Munetsuna E, Yamazaki M, Mizuno G, Murase Y, et al. Relationship  
309 between Long Interspersed Nuclear Element-1 DNA Methylation in Leukocytes and Dyslipidemia in  
310 the Japanese General Population. *J Atheroscler Thromb* 2018;25(12): 1231-1239. doi:  
311 10.5551/jat.43570. PubMed PMID: 29628482.

312 20. Dick KJ, Nelson CP, Tsaprouni L, Sandling JK, Aïssi D, Wahl S, et al. DNA methylation and  
313 body-mass index: a genome-wide analysis. *Lancet* 2014;383(9933): 1990-1998. doi: 10.1016/S0140-  
314 6736(13)62674-4. PubMed PMID: 24630777.

315 21. Main AM, Gillberg L, Jacobsen AL, Nilsson E, Gjesing AP, Hansen T, et al. DNA methylation  
316 and gene expression of HIF3A: cross-tissue validation and associations with BMI and insulin  
317 resistance. *Clin Epigenetics* 2016;8(1): 89. doi: 10.1186/s13148-016-0258-6. PubMed PMID:  
318 27594926.

319 22. Wang S, Song J, Yang Y, Zhang Y, Wang H, Ma J. HIF3A DNA Methylation Is Associated with  
320 Childhood Obesity and ALT. *PLoS One* 2015;10(12): e0145944. doi: 10.1371/journal.pone.0145944.  
321 PubMed PMID: 26717317.

- 322 23. Duan C. Hypoxia-inducible factor 3 biology: complexities and emerging themes. *Am J Physiol*
- 323 *Cell Physiol* 2016;310(4): C260-269. doi: 10.1152/ajpcell.00315.2015. PubMed PMID: 26561641.
- 324 24. Ravenna L, Salvatori L, Russo MA. HIF3 $\alpha$ : the little we know. *Febs j* 2016;283(6): 993-1003. doi:
- 325 10.1111/febs.13572. PubMed PMID: 26507580.
- 326 25. Pfeiffer S, Krüger J, Maierhofer A, Böttcher Y, Klötting N, El Hajj N, et al. Hypoxia-inducible
- 327 factor 3A gene expression and methylation in adipose tissue is related to adipose tissue dysfunction.
- 328 *Sci Rep* 2016;6: 27969. doi: 10.1038/srep27969. PubMed PMID: 27346320.
- 329 26. Zhang Y, Chen Y, Qu H, Wang Y. Methylation of HIF3A promoter CpG islands contributes to
- 330 insulin resistance in gestational diabetes mellitus. *Mol Genet Genomic Med* 2019;7(4): e00583. doi:
- 331 10.1002/mgg3.583. PubMed PMID: 30743315.
- 332 27. Maeda K, Yamada H, Munetsuna E, Fujii R, Yamazaki M, Ando Y, et al. Association of smoking
- 333 habits with TXNIP DNA methylation levels in leukocytes among general Japanese population. *PLoS*
- 334 *One* 2020;15(7): e0235486. doi: 10.1371/journal.pone.0235486. PubMed PMID: 32609762.
- 335 28. Silva CP, Kamens HM. Cigarette smoke-induced alterations in blood: A review of research on
- 336 DNA methylation and gene expression. *Exp Clin Psychopharmacol*. Epub ahead of print 13 July 2020.

- 337 DOI: 10.1037/pha0000382. PubMed PMID: 32658533.
- 338 29. Ando Y, Yamazaki M, Yamada H, Munetsuna E, Fujii R, Mizuno G, et al. Association of  
339 circulating miR-20a, miR-27a, and miR-126 with non-alcoholic fatty liver disease in general  
340 population. *Sci Rep* 2019;9(1): 18856. doi: 10.1038/s41598-019-55076-z. PubMed PMID: 31827150.
- 341 30. Yamada H, Suzuki K, Ichino N, Ando Y, Sawada A, Osakabe K, et al. Associations between  
342 circulating microRNAs (miR-21, miR-34a, miR-122 and miR-451) and non-alcoholic fatty liver. *Clin*  
343 *Chim Acta* 2013;424: 99-103. doi: 10.1016/j.cca.2013.05.021. PubMed PMID: 23727030.
- 344 31. Munetsuna E, Yamada H, Ando Y, Yamazaki M, Tsuboi Y, Kondo M, et al. Association of  
345 subcutaneous and visceral fat with circulating microRNAs in a middle-aged Japanese population. *Ann*  
346 *Clin Biochem* 2018;55: 437-445. doi: 10.1177/0004563217735124. PubMed PMID: 28920467.
- 347 32. Botek M, Krejčí J, McKune A. Sex Differences in Autonomic Cardiac Control and Oxygen  
348 Saturation Response to Short-Term Normobaric Hypoxia and Following Recovery: Effect of Aerobic  
349 Fitness. *Front Endocrinol (Lausanne)* 2018;23(9): 697. doi: 10.3389/fendo.2018.00697. PubMed  
350 PMID: 30532736.
- 351 33. Huang T, Zheng Y, Qi Q, Xu M, Ley SH, Li Y, et al. DNA Methylation Variants at HIF3A Locus,

- 352 B-Vitamin Intake, and Long-term Weight Change: Gene-Diet Interactions in Two U.S. Cohorts.
- 353 *Diabetes* 2015;64(9): 3146-3154. doi: 10.2337/db15-0264. PubMed PMID: 26001398.
- 354 34. Watanabe T, Tsujino I, Konno S, Ito YM, Takashina C, Sato T, et al. Association between Smoking
- 355 Status and Obesity in a Nationwide Survey of Japanese Adults. *PLoS One* 2016;11(3): e0148926. doi:
- 356 10.1371/journal.pone.0148926. PubMed PMID: 27007232.
- 357 35. Hatanaka M, Shimba S, Sakaue M, Kondo Y, Kagechika H, Kokame K, et al. Hypoxia-inducible
- 358 factor-3alpha functions as an accelerator of 3T3-L1 adipose differentiation. *Biol Pharm Bull*
- 359 2009;32(7): 1166-1172. doi: 10.1248/bpb.32.1166. PubMed PMID: 19571379.

Sequence 1→

5' – GTAGGAGGGGATGCGGTGTAGTTAGGATTCGGGTGCGAGTTACGAGT

Sequence 2→

GGGTGCGTACGGCGGTGAGATGATTTTATAGGAAAGGGTCTGGTTTTG

cg16672562

cg22891070

GGTGGGGAGGGGGGGTATTCGAGTTTAGTTAAGAGGGGGTTTTTATT

AGTTAGGAGGGGGGCGTTGAGAGGGGGCGGAACGATAGTTGGTTTAAAA – 3'

cg27146050

Figure
